# Supplementary material for: Characterization of Fetal Keratinocytes, Showing Enhanced Stem Cell-Like Properties: A Potential Source of Cells for Skin Reconstruction
Source: PubMed Central journal article supplement — Stem Cell Reports. 2014 Jul 10;3(2):324–38. doi: 10.1016/j.stemcr.2014.06.005 (PMC4175556; doi:10.1016/j.stemcr.2014.06.005), 2014-07-10
Supplement: mmc1.pdf [file mmc1.pdf]

**Stem Cell Reports, Volume 3**

**Supplemental Information**

**Characterization of Fetal Keratinocytes, Showing Enhanced  
Stem Cell-Like Properties: A Potential Source of Cells for  
Skin Reconstruction**

**Kenneth K.B. Tan, Giorgiana Salgado, John E. Connolly, Jerry K.Y. Chan, and E.  
Birgitte Lane**

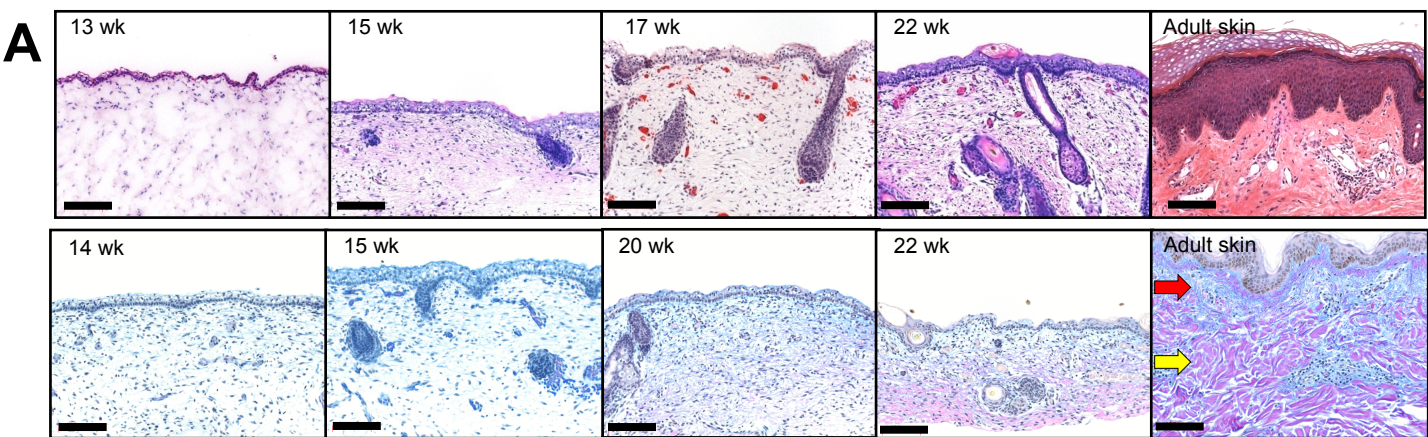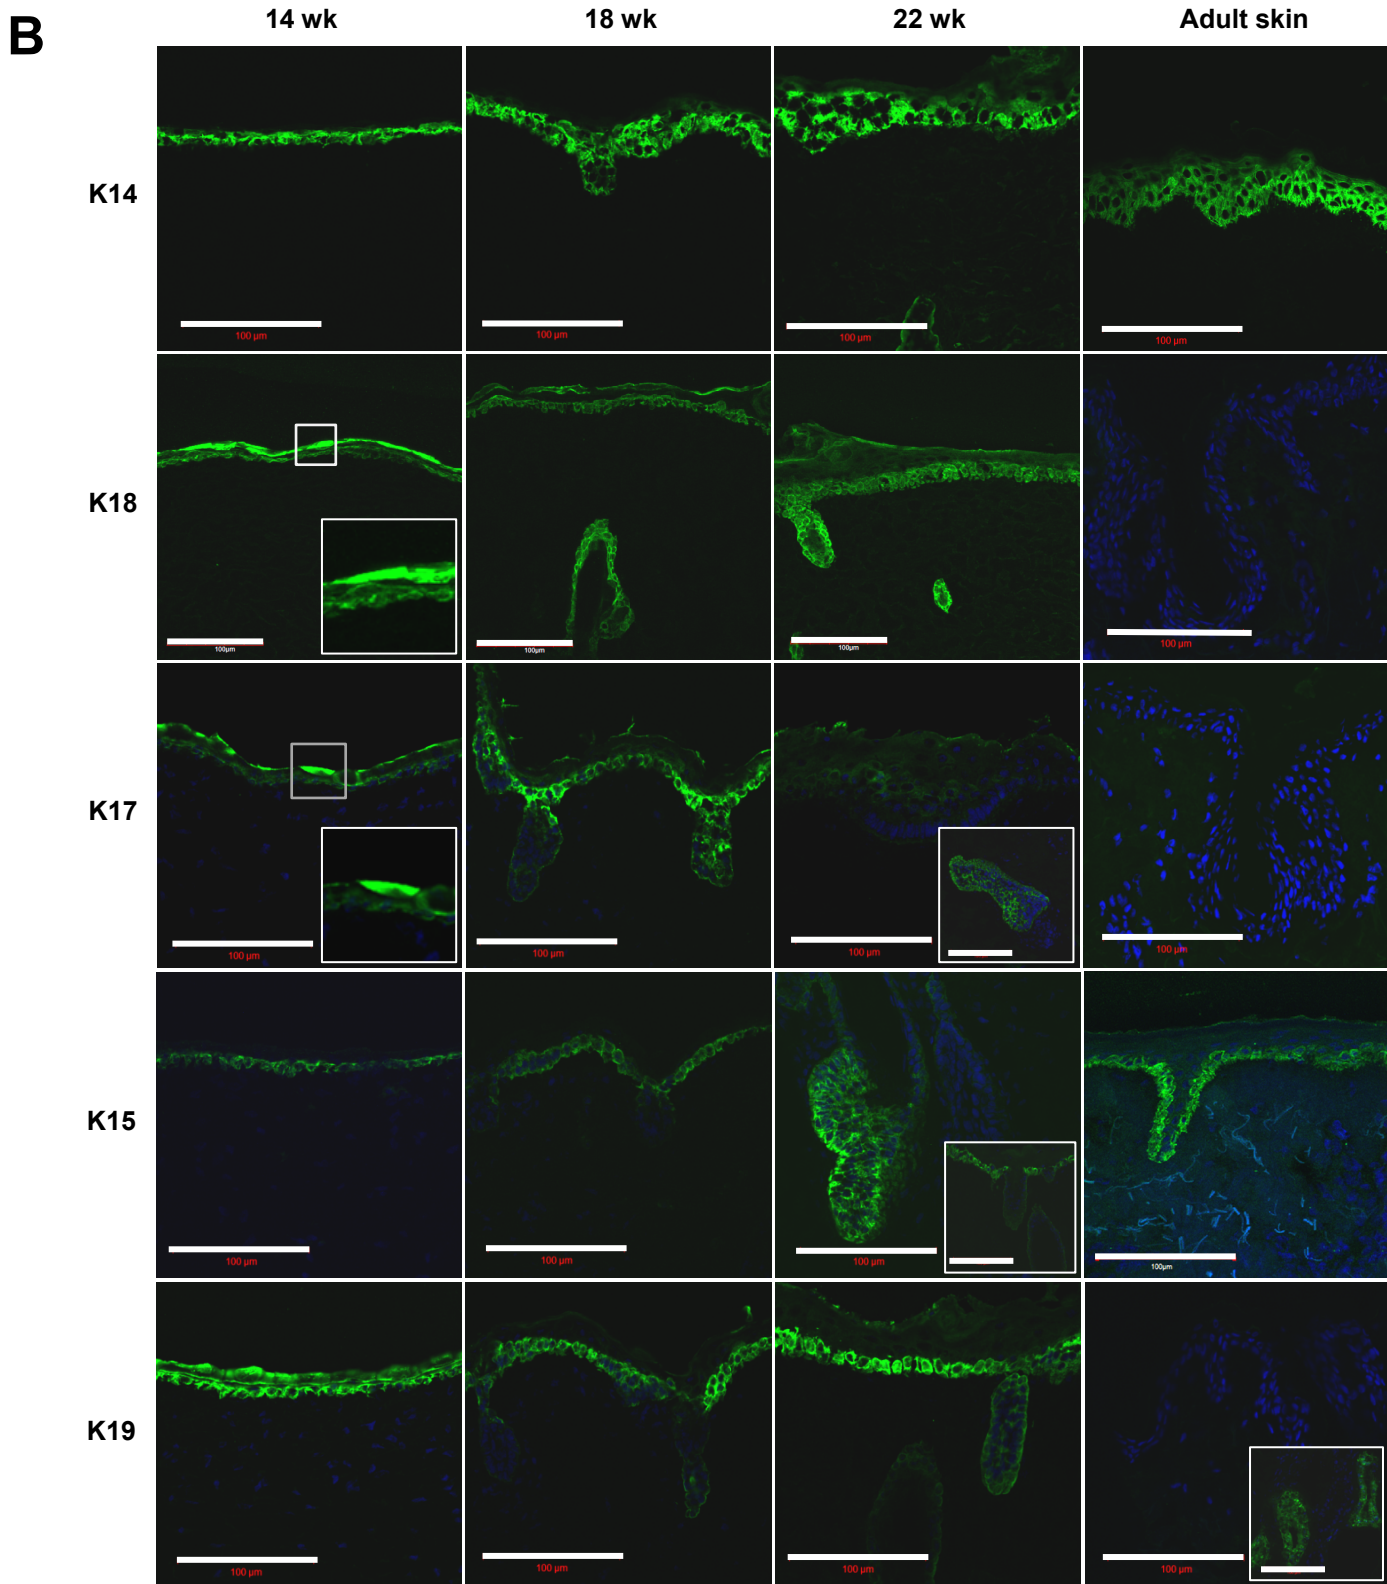

Figure S1

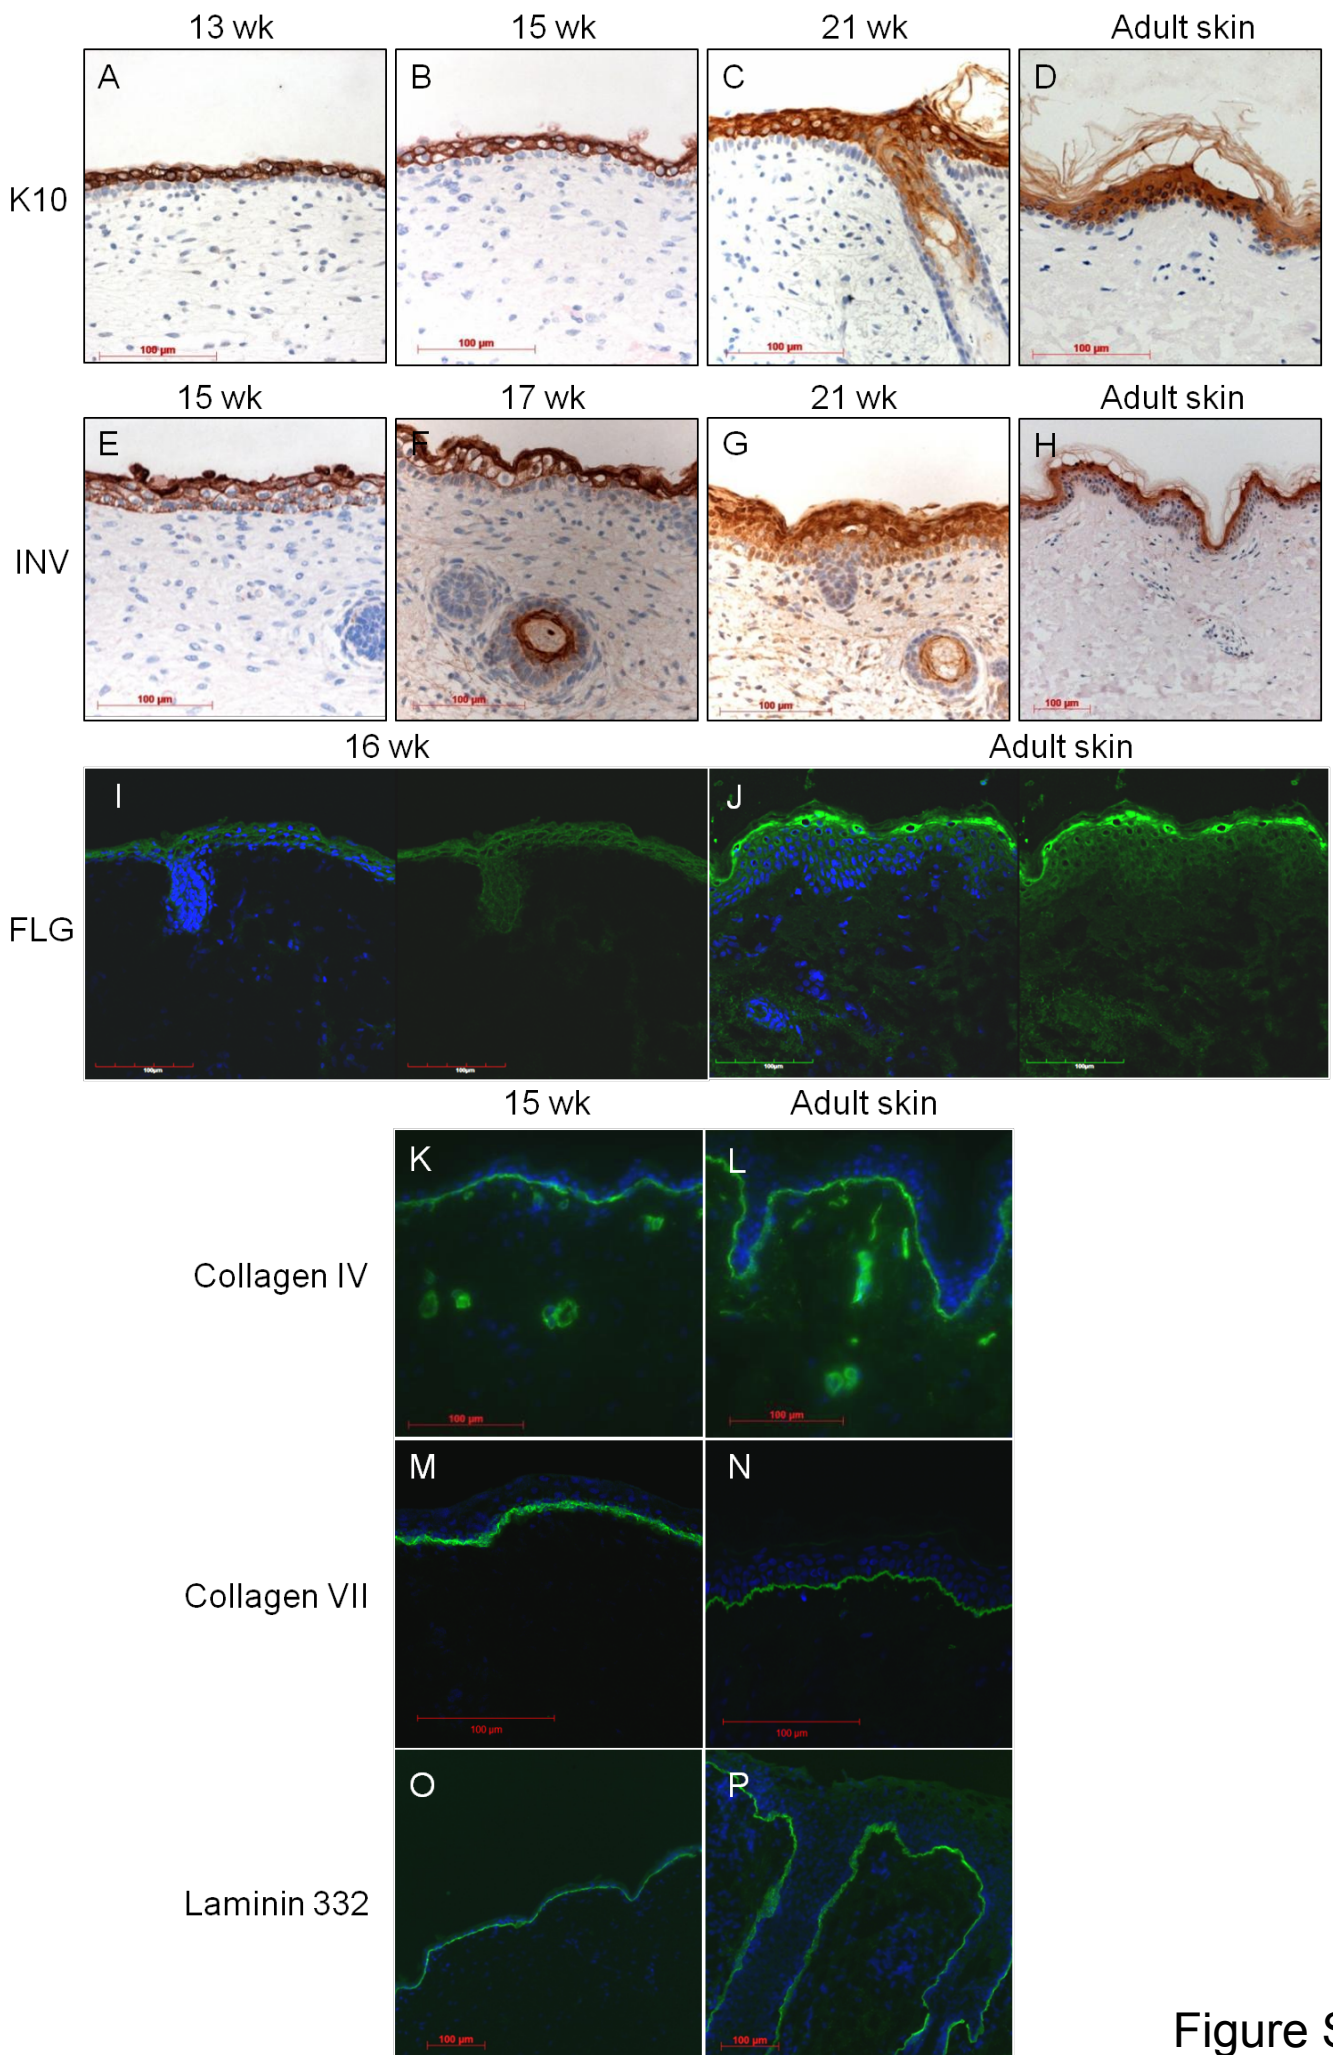

Figure S2

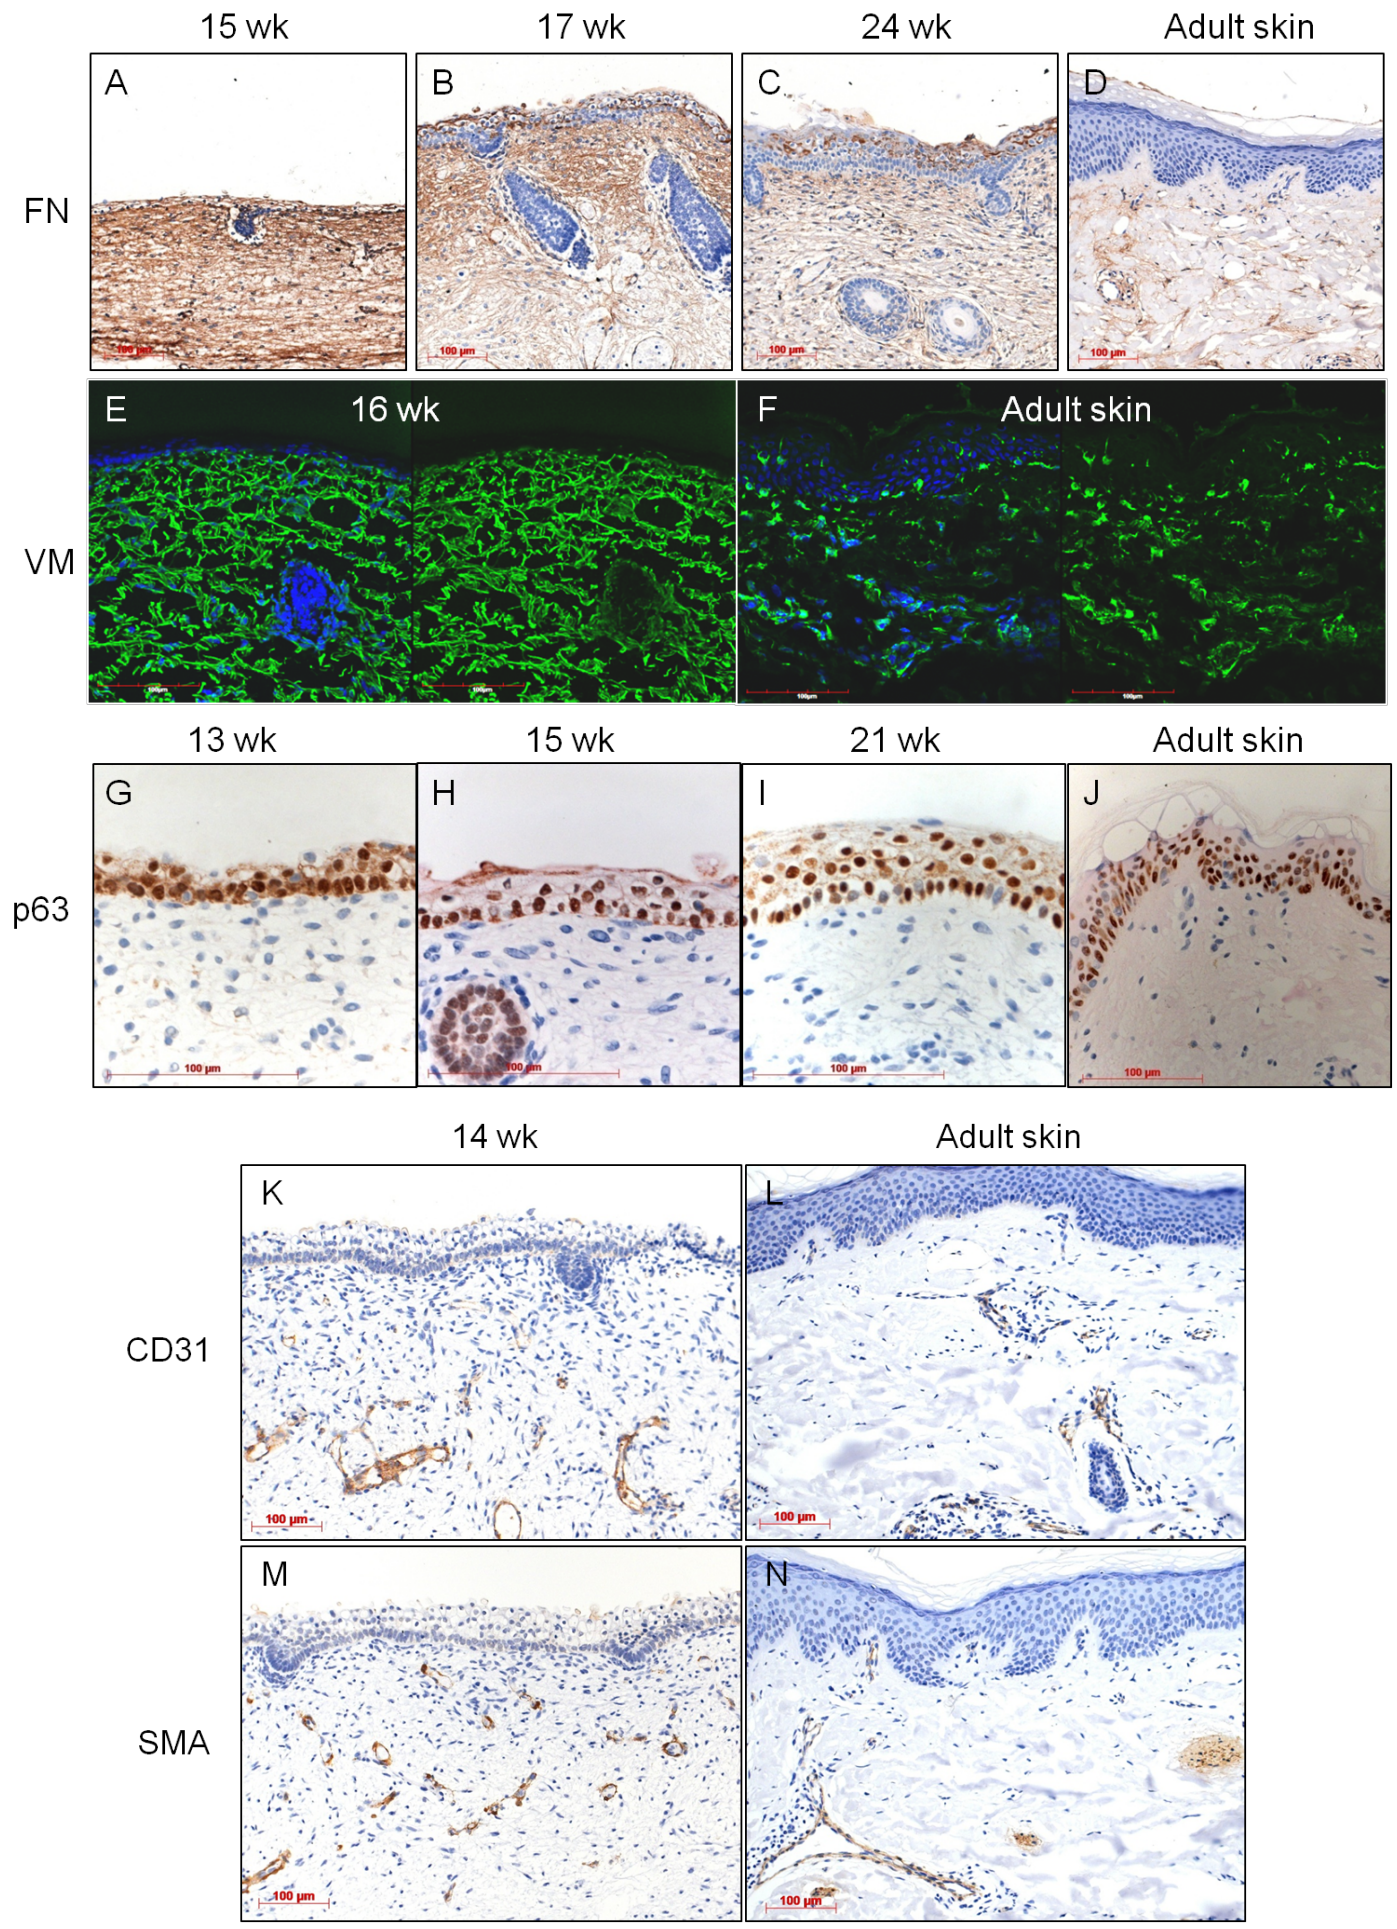

Figure S3

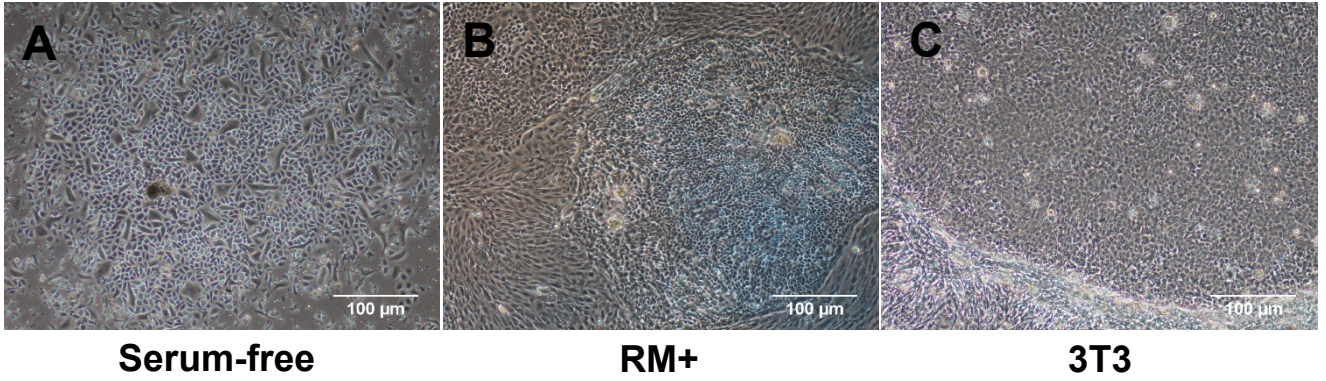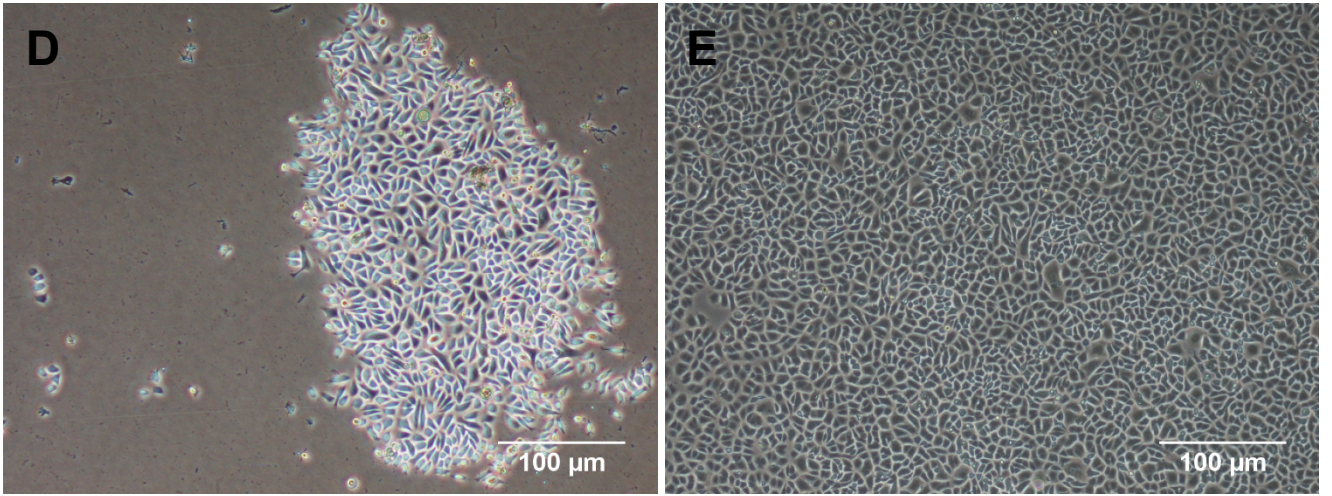

**F** Average Cell Diameter of Keratinocytes

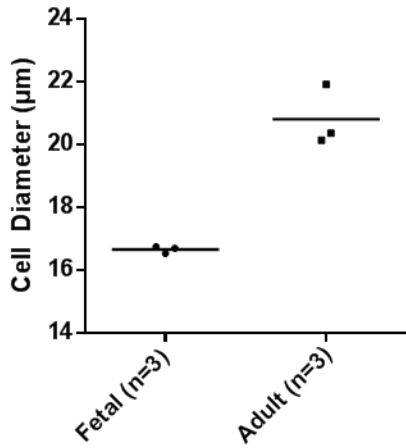

**G** Average Cell Volume of Keratinocytes

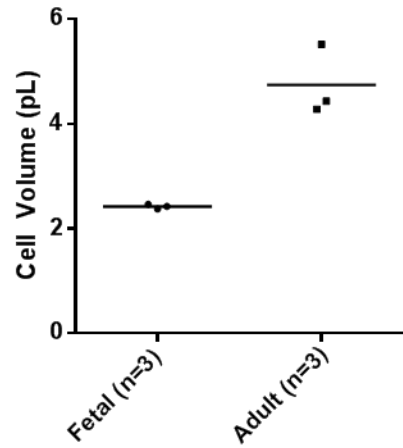

Figure S4

**A**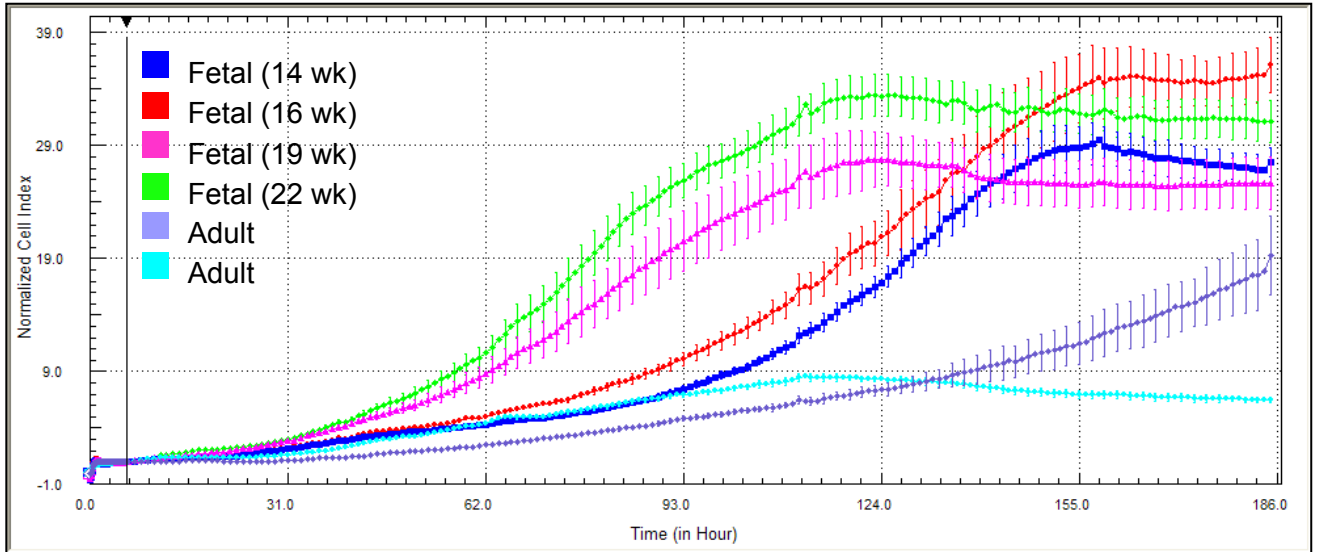**B**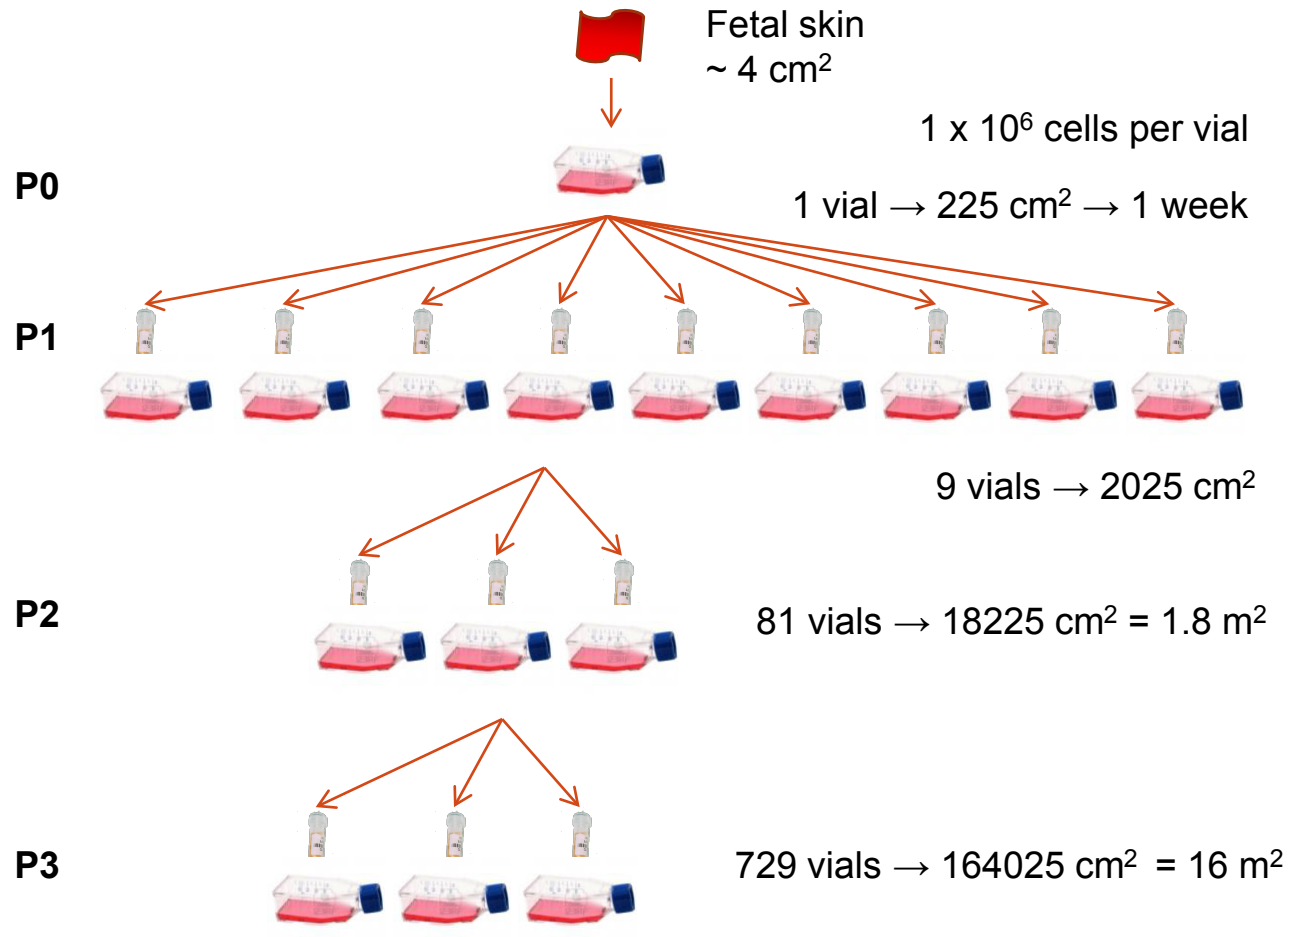

Figure S5

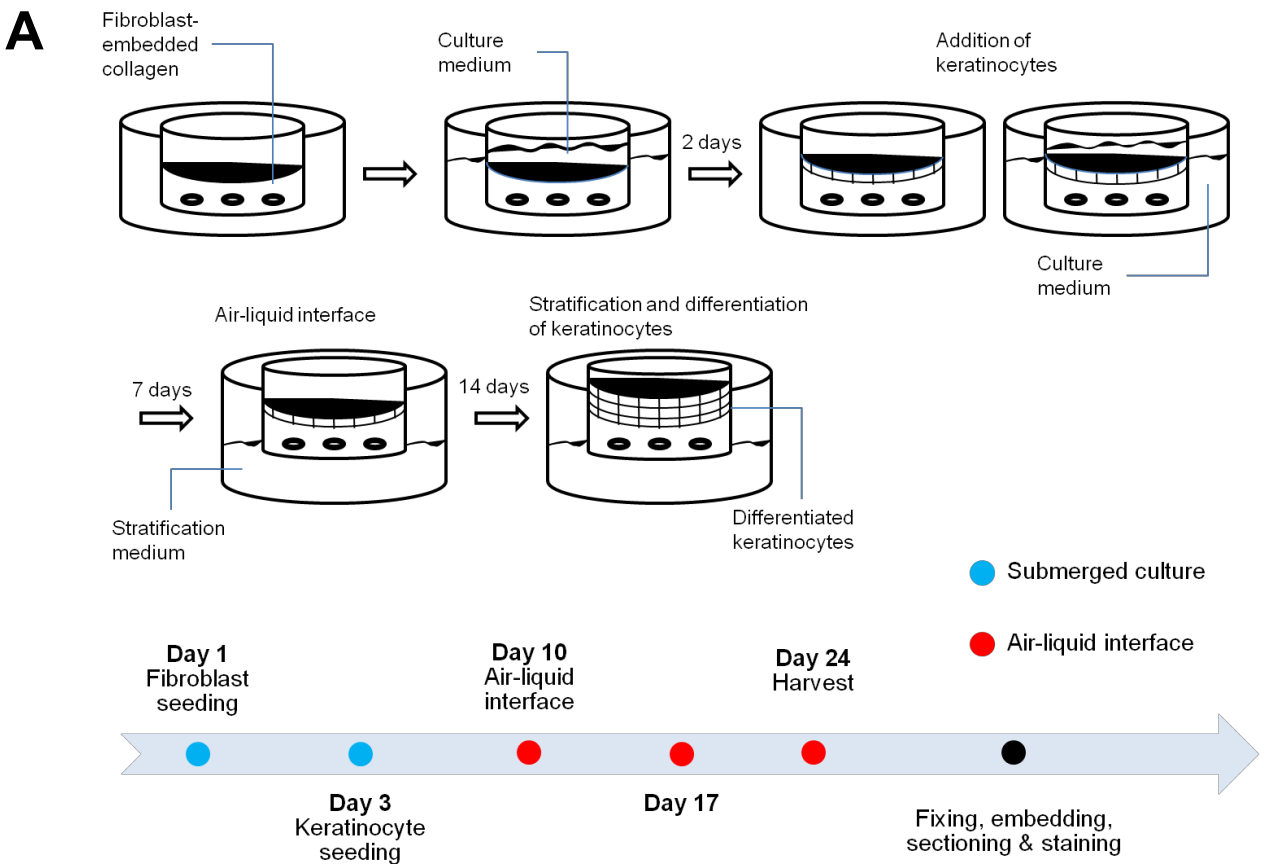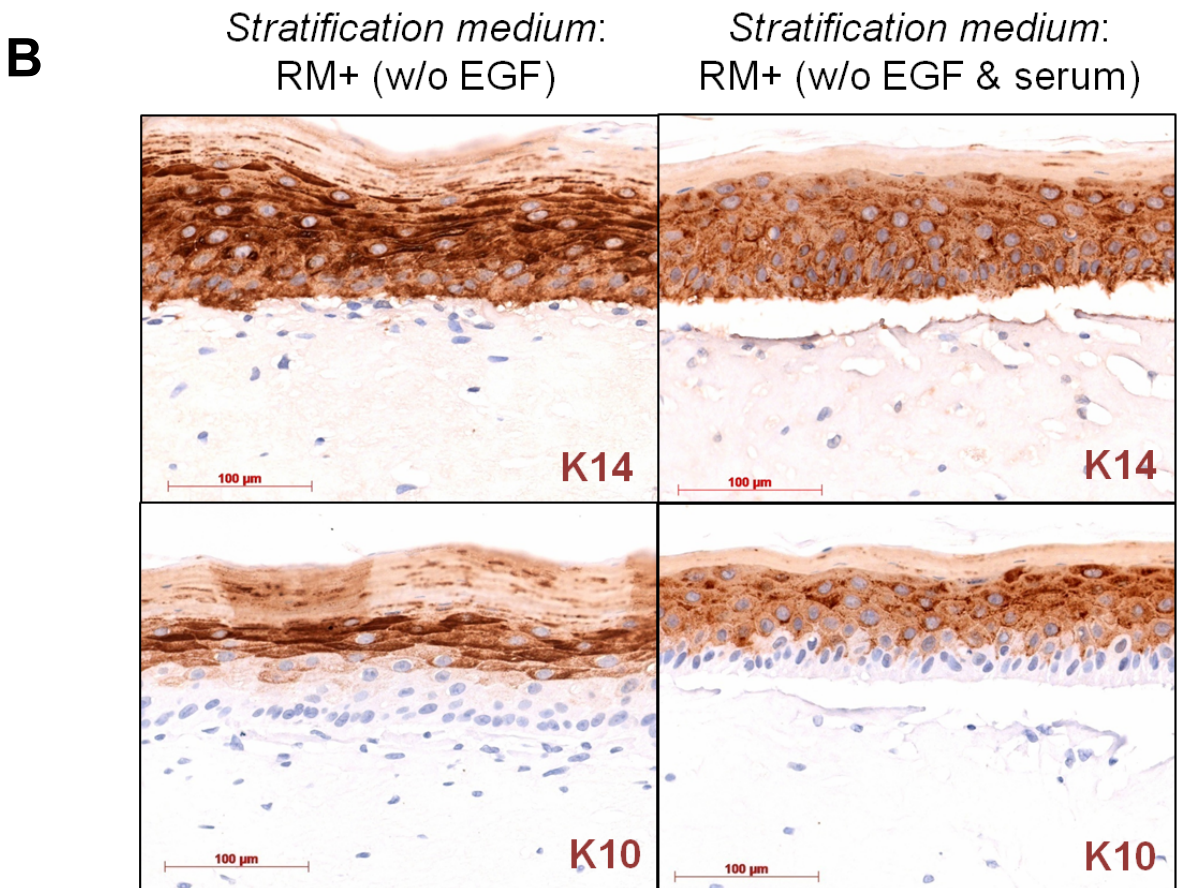

Figure S6

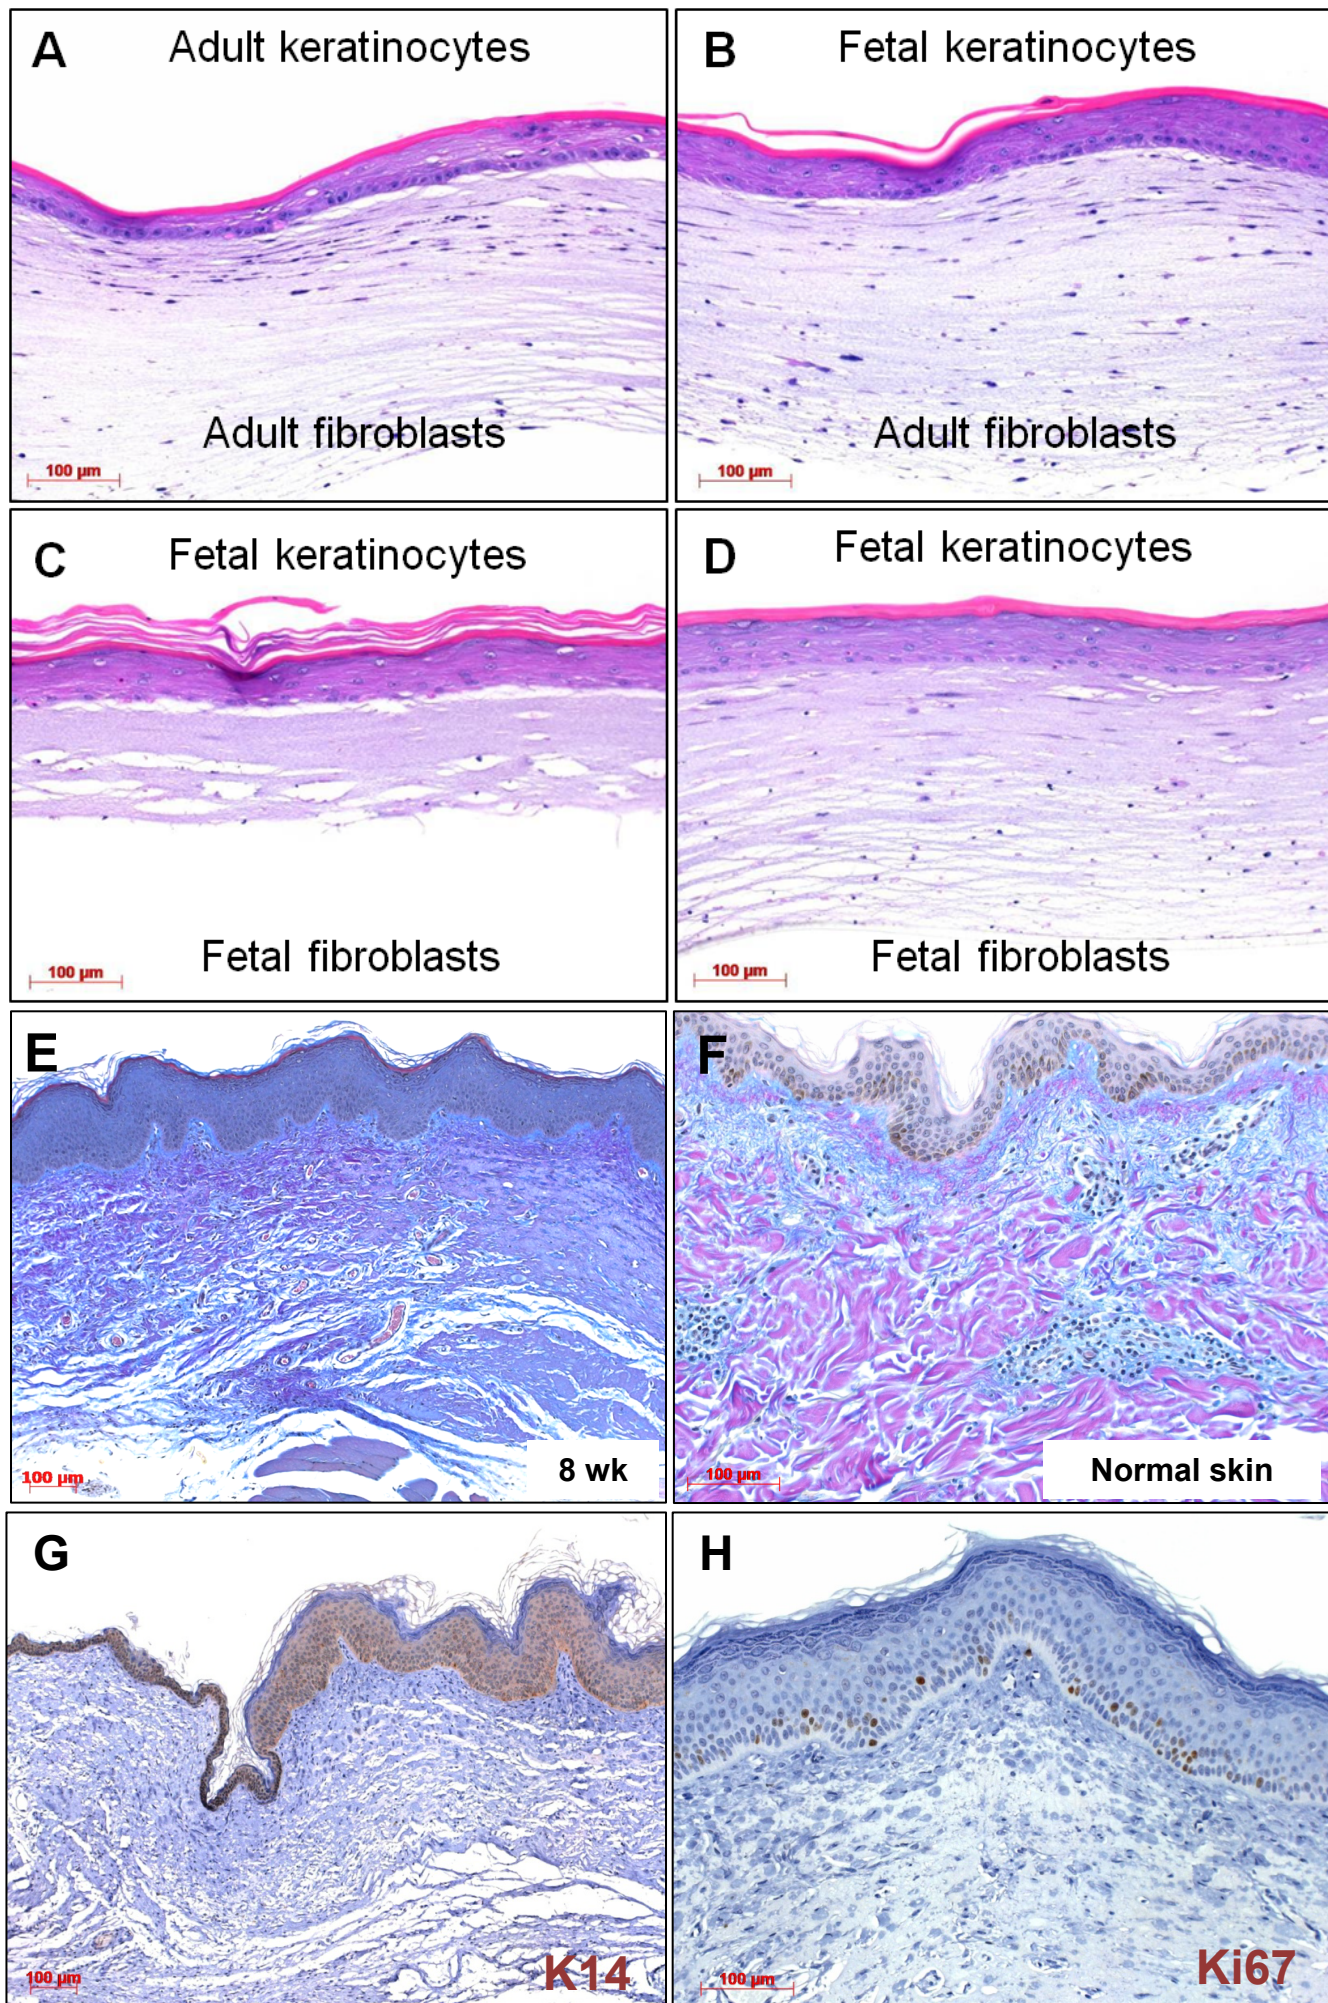

Figure S7



## SUPPLEMENTAL FIGURE LEGENDS

### Figure S1

**Characterization of fetal skin, related to Figure 1.** (A) *Top panel:* Histology of 13, 15, 17, and 22 weeks' gestation fetal skin and of adult skin. Fetal epidermis at 13 – 14 weeks gestation consists of a basal layer, a single intermediate/suprabasal layer and the overlying periderm (Figure 1A). Fetal dermis has a high density of fibroblasts and finely fibrillar matrix. From 15 weeks gestation, hair pegs can be seen projecting into the dermis, developing into recognizable hair follicles by about 17 weeks. The number of epidermal cell layers continues to increase with gestation, with the stratum corneum forming from 19 weeks gestation. By comparison, adult skin is thicker, with the epidermis consisting of 4-6 cell layers of outwardly-moving and progressively differentiating keratinocytes. *Bottom panel:* Herovici's staining of 14, 15, 20 and 22 weeks' gestation fetal (dorsal) skin and of adult skin. A higher ratio was observed of type III collagen (stained blue, red arrows) to type I collagen (stained pink, yellow arrows) in fetal skin than adult skin. With increasing gestation however, collagen I becomes more prominent especially in the reticular dermis as in the adult skin. Scale bar, 100  $\mu\text{m}$ . (B) Immunofluorescence staining of keratins in fetal and adult epidermis. K18, K17, and K19 were present in fetal epidermis but not in adult epidermis. Scale bar, 100  $\mu\text{m}$ .

### Figure S2

**Immunostaining of differentiation markers and basement membrane proteins in fetal and adult skin, related to Figure 1.** K10, involucrin (INV), and filaggrin (FLG) in fetal (A-C, E-G, I) and adult (D, H, J) epidermis. The presence of differentiated keratinocytes was detected as early as 13 weeks. Presence of collagen IV, collagen VII and laminin 332 in fetal (K, M, O) and adult epidermis (L, N, P). Scale bar, 100  $\mu\text{m}$ .

### Figure S3

**Immunostaining of fibronectin (FN), vimentin (VM), and p63, and blood vessels in fetal and adult skin, related to Figure 1.** Fetal (A-C, E, G-I) and adult epidermis (D,F,J). Fetal dermis contains more fibronectin and vimentin compared to adult dermis. p63 is expressed in the nuclei of epidermal cells, more so in the basal cells in both fetal and adult epidermis. Dermal tissue did not contain any individual p63-positive cells. (K-N) Presence of blood vessels in 14 week gestation fetal skin stained with CD31 and  $\alpha$ -smooth muscle actin (SMA). Scale bar, 100  $\mu$ m.

### Figure S4

**Culture of fetal keratinocytes, related to Figures 1 and 2.** Isolated cells can be cultured in (A) serum-free keratinocyte media, (B) complete RM+ media, or (C) co-cultured with irradiated 3T3 murine fibroblasts. (D) Removal of contaminating fibroblasts in serum-free media. The serum-free method of culture was adopted in all the experiments. (E) Confluent keratinocytes in serum-free media. RM+ medium consists of a mixture of 3 parts Dulbecco's modified Eagle's medium (DMEM) to 1 part Ham's nutrient mixture F12 medium, supplemented with 10% fetal bovine serum, 5  $\mu$ g/ml insulin, 0.4  $\mu$ g/ml hydrocortisone, 5  $\mu$ g/ml transferrin,  $1.8 \times 10^{-4}$  M adenine, 10 ng/ml epidermal growth factor (EGF) and  $2 \times 10^{-11}$  M triiodothyronine. Scale bar, 100  $\mu$ m. (F) Fetal keratinocytes are smaller in size compared to adult keratinocytes. Average cell diameter of fetal and adult keratinocytes at P4 cultured in serum-free medium. (G) Average cell volume of fetal and adult keratinocytes at P4 cultured in serum-free medium. Data are represented as mean of 3 biological replicates.

## Figure S5

**Proliferative potential of fetal keratinocytes, related to Figure 3.** (A) Growth curves of fetal and adult keratinocytes. The population doubling times are derived from each exponential phases of the growth curves. Fetal and adult keratinocytes were plated in the 96-well plates in 5 replicates at 2500 cells per well. Cell growth was monitored over a period of 1 week. (B) A  $\sim 4 \text{ cm}^2$  of fetal skin will on average generate sufficient cells to be expanded to an area of  $16 \text{ m}^2$  within 1 week after recovering live cells from a frozen cell bank.

## Figure S6

**Optimization of organotypic co-cultures, related to Figure 7.** (A) Schematic illustration of experimental method for organotypic co-culture. (B) Immunoperoxidase staining of organotypic co-cultures with keratin 14 (K14) and keratin 10 (K10). In all conditions, K14 was expressed at the epidermal layer. Organotypic cultures at air-liquid interface that were cultured with RM+ medium without epidermal growth factor (EGF) and serum expressed K10 in the suprabasal layers immediately above the basal layer unlike those cultured with serum, in which K10 was expressed much later at the top layers, suggesting that keratinocyte differentiation conditions were suboptimal when cultured with serum. Organotypic experiments were thus cultured without serum when cultures were raised to air-liquid interface. Scale bar, 100  $\mu\text{m}$ .

## Figure S7

**Characterization of culture-generated grafts, related to Figure 7.** (A-D) Histological appearance of culture-generated human fetal skin using fibrin gel as a dermal equivalent. Organotypic cultures made with adult or fetal cells show similar stratification *in vitro* on

fibrin gels. Fibrin gel-based constructs supported the growth and differentiation of fetal and adult keratinocytes, forming epidermal-like structure and a cornified layer. (E) Herovici's staining of culture-generated human fetal skin on back of SCID mouse. Herovici's stain is capable of distinguishing between types I and III collagen, where the fine type III collagen fibres (young collagen) stain blue, and the thick and coarser type I collagen fibres (old collagen) stain pink. At 8 weeks post-grafting, a distinct layer of blue-staining fine collagen III fibres can be observed immediately underneath the epidermis, similar to the collagen architecture of normal human skin (F). Collagen I can also be seen throughout the dermis. (G-H) Immunostaining of K14 and proliferation marker Ki67 on the regenerated human skin (8 weeks post-grafting). K14 was stained throughout the human and mouse epidermis, and the proliferation marker Ki67 was mostly confined to the basal layer of the regenerated human epidermis. Scale bar, 100  $\mu\text{m}$ .

**Table S1****Immunohistochemical staining of various markers in fetal and adult skin**

| <b>Marker</b>                                                     | <b>Fetal Skin</b>                           | <b>Adult Skin</b>           | <b>Clone</b> |
|-------------------------------------------------------------------|---------------------------------------------|-----------------------------|--------------|
| <i><b>Keratins</b></i>                                            |                                             |                             |              |
| K14                                                               | ++ (basal); + (follicle)                    | ++                          | LL001        |
| K18                                                               | ++ (basal); ++ (periderm);<br>++ (follicle) | –                           | LDK18        |
| K17                                                               | ++ (basal); + (periderm);<br>+ (follicle)   | –                           | E3           |
| K15                                                               | ++ (basal); + (follicle)                    | +                           | LHK15        |
| K19                                                               | ++ (basal); ++ (periderm);<br>+ (follicle)  | – (basal); + (follicle)     | LP2K         |
| <i><b>Differentiation</b></i>                                     |                                             |                             |              |
| K10                                                               | ++ (suprabasal);<br>+ (periderm)            | ++ (suprabasal)             | LH1          |
| Involucrin                                                        | ++ (suprabasal);<br>++ (periderm)           | ++ (suprabasal)             | SY5          |
| Filaggrin                                                         | ± (suprabasal)                              | ++ (suprabasal)             | 15C10        |
| <i><b>Basement membrane proteins</b></i>                          |                                             |                             |              |
| Collagen IV                                                       | ++ (BM); ++ (bl vessels)                    | ++ (BM);<br>++ (bl vessels) | PHM12        |
| Collagen VII                                                      | ++ (BM)                                     | ++ (BM)                     | LH7.2        |
| Laminin 332                                                       | ++ (BM)                                     | ++ (BM)                     | D4B5         |
| <i><b>Extracellular matrix proteins</b></i>                       |                                             |                             |              |
| Fibronectin                                                       | ++ (pap dermis);<br>+ (ret dermis)          | ± (dermis)                  | 568          |
| <i><b>Intermediate filament proteins in connective tissue</b></i> |                                             |                             |              |
| Vimentin                                                          | ++ (dermis)                                 | + (dermis)                  | V9           |

---

***Others***

|                               |                       |                       |            |
|-------------------------------|-----------------------|-----------------------|------------|
| p63                           | ++ (epidermal nuclei) | ++ (epidermal nuclei) | 4A4        |
| CD31                          | ++ (bl vessels)       | ++ (bl vessels)       | Polyclonal |
| $\alpha$ -smooth muscle actin | ++ (bl vessels)       | ++ (bl vessels)       | 1A4        |

---

BM: basement membrane; bl: blood; pap: papillary; ret: reticular

**Table S2****Antibodies used for Immunocytochemistry**

| <b>Antigen</b>                | <b>Clone</b>         | <b>Working dilution</b>       | <b>Source</b>      | <b>Species</b> |
|-------------------------------|----------------------|-------------------------------|--------------------|----------------|
| Keratin K14                   | LL001 <sup>1</sup>   | undiluted culture supernatant | E B Lane labs      | Mouse          |
| Keratin K18                   | LDK18*               | undiluted culture supernatant | E B Lane labs      | Mouse          |
| Keratin K19                   | LP2K <sup>2</sup>    | undiluted culture supernatant | E B Lane labs      | Mouse          |
| Keratin K15                   | LHK15 <sup>3</sup>   | 1:50                          | Gift from IM Leigh | Mouse          |
| Keratin K17                   | E3 <sup>4</sup>      | 1:20                          | Novocastra         | Mouse          |
| Collagen IV                   | PHM12 <sup>5</sup>   | 1:100                         | Novocastra         | Mouse          |
| Collagen VII                  | LH7.2 <sup>6</sup>   | 1:50                          | Novocastra         | Mouse          |
| Laminin 332                   | D4B5 <sup>7</sup>    | 1:50                          | Chemicon           | Mouse          |
| Fibronectin                   | 568                  | 1:100                         | Novocastra         | Mouse          |
| Vimentin                      | V9 <sup>8</sup>      | 1:50                          | Novocastra         | Mouse          |
| Ki67                          | MM-1 <sup>9</sup>    | 1:50                          | Novocastra         | Mouse          |
| Involucrin                    | SY5 <sup>10</sup>    | 1:50                          | Novocastra         | Mouse          |
| Keratin K10                   | LH1 <sup>11</sup>    | undiluted culture supernatant | Gift from IM Leigh | Mouse          |
| Filaggrin                     | 15C10                | 1:50                          | Novocastra         | Mouse          |
| p63                           | 4A4 <sup>12</sup>    | 1:50                          | Gift from F McKeon | Mouse          |
| Keratin K7                    | OV-TL 12/30          | 1:100                         | Novocastra         | Mouse          |
| HLA-ABC                       | W6/32 <sup>13</sup>  | 1:100                         | DAKO               | Mouse          |
| HLA-DP, DQ,DR                 | CR3/43 <sup>14</sup> | 1:100                         | DAKO               | Mouse          |
| nucleoli                      | LP4N <sup>15</sup>   | undiluted culture supernatant | E B Lane labs      | Mouse          |
| CD31                          | Polyclonal           | 1:50                          | Novus Biologicals  | Mouse          |
| $\alpha$ -smooth muscle actin | 1A4                  | 1:100                         | Abcam              | Mouse          |
| MTS24 / PLET-1                | 700738               | 1:50                          | R&D Systems        | Rat            |
| DLL1                          | polyclonal           | 1:100                         | Abcam              | Mouse          |

## Antibody references:

\*E B Lane, unpublished.

- <sup>1</sup>Purkis, P.E., J.B. Steel, I.C. Mackenzie, W.B. Nathrath, I.M. Leigh, and E.B. Lane. 1990. Antibody markers of basal cells in complex epithelia. *J Cell Sci.* 97 ( Pt 1):39-50.
- <sup>2</sup>Stasiak, P.C., P.E. Purkis, I.M. Leigh, and E.B. Lane. 1989. Keratin 19: predicted amino acid sequence and broad tissue distribution suggest it evolved from keratinocyte keratins. *J Invest Dermatol.* 92:707-16.
- <sup>3</sup>Waseem, A., B. Dogan, N. Tidman, Y. Alam, P. Purkis, S. Jackson, A. Lalli, M. Machesney, and I.M. Leigh. 1999. Keratin 15 expression in stratified epithelia: downregulation in activated keratinocytes. *J Invest Dermatol.* 112:362-9.
- <sup>4</sup>Guelstein, V.I., T.A. Tchypysheva, V.D. Ermilova, L.V. Litvinova, S.M. Troyanovsky, and G.A. Bannikov. 1988. Monoclonal antibody mapping of keratins 8 and 17 and of vimentin in normal human mammary gland, benign tumors, dysplasias and breast cancer. *Int J Cancer.* 42:147-53.
- <sup>5</sup>Hancock, W.W., N. Kraft, F. Clarke, and R.C. Atkins. 1984. Production of monoclonal antibodies to fibronectin, type IV collagen and other antigens of the human glomerulus. *Pathology.* 16:197-206.
- <sup>6</sup>Tatnall, F.M., P.C. Whitehead, M.M. Black, F. Wojnarowska, and I.M. Leigh. 1989. Identification of the epidermolysis bullosa acquisita antigen by LH 7.2 monoclonal antibody: use in diagnosis. *Br J Dermatol.* 120:533-9.
- <sup>7</sup>Mizushima, H., Koshikawa, N., Moriyama, K., Takamura, H., Nagashima, Y., & Hirahara, F., et al. (1998). Wide distribution of laminin-5 gamma 2 chain in basement membranes of various human tissues. *Horm Res.*, 2, 7-14.
- <sup>8</sup>Bohn, W., Wieggers, W., Beuttenmüller, M., & Traub, P. (1992). Species-specific recognition patterns of monoclonal antibodies directed against vimentin. *Exp Cell Res.*, 201(1), 1-7.
- <sup>9</sup>Gerdes, J., Schwab, U., Lemke, H., & Stein, H. (1983). Production of a mouse monoclonal antibody reactive with a human nuclear antigen associated with cell proliferation. *Int J Cancer.*, 31(1), 13-20.
- <sup>10</sup>Hudson, D., Weiland, K., Dooley, T., Simon, M., & Watt, F. (1992). Characterisation of eight monoclonal antibodies to involucrin. *Hybridoma.*, 11(3), 367-379.
- <sup>11</sup>Leigh, I., Purkis, P., Whitehead, P., & Lane, E.B. (1993). Monospecific monoclonal antibodies to keratin 1 carboxy terminal (synthetic peptide) and to keratin 10 as markers of epidermal differentiation. *Br J Dermatol.*, 129(2), 110-119.
- <sup>12</sup>Yang, A., Kaghad, M., Wang, Y., Gillett, E., Fleming, M., & Dötsch, V., et al. (1998). p63, a p53 homolog at 3q27-29, encodes multiple products with transactivating, death-inducing, and dominant-negative activities. *Mol Cell.*, 2(3), 305-316.
- <sup>13</sup>Barnstable, C., Bodmer, W., Brown, G., Galfre, G., Milstein, C., & Williams, A., et al. (1978). Production of monoclonal antibodies to group A erythrocytes, HLA and other human cell surface antigens-new tools for genetic analysis. *Cell.*, 14(1), 9-20.
- <sup>14</sup>Falini, B., Martelli, M., Tarallo, F., Moir, D., Cordell, J., & Gatter, K., et al. (1984). Immunohistological analysis of human bone marrow trephine biopsies using monoclonal antibodies. *Br J Haematol.*, 56(3), 365-386.
- <sup>15</sup>Jeppe-Jensen, D., H. Clausen, I.M. Leigh, E.B. Lane, and E. Dabelsteen. 1993. Three monoclonal antibodies differentiate human from murine epidermis. *Epithelial Cell Biol.* 2:100-6.



**Table S3****Antibodies for Flow Cytometry**

| <b>Antibody</b> | <b>Clone</b> | <b>Working dilution</b> | <b>Source</b> | <b>Species</b> |
|-----------------|--------------|-------------------------|---------------|----------------|
| HLA-ABC         | W6/32        | 1:10                    | Dako          | Mouse          |
| HLA-DP, DQ,DR   | CR3/43       | 1:10                    | Dako          | Mouse          |

## **SUPPLEMENTAL EXPERIMENTAL PROCEDURES**

### **Calculation of Proliferation Index in Tissues**

Ki67-positive cells were counted by light microscopy (magnification 63×) at five random non-overlapping regions of each tissue section. Median number of basal cells was 30 (range 21 – 45). Values are expressed as the mean PI at each gestational age (PI = number of Ki67-positive basal cells/total basal cells ×100).

### **Growth Kinetics and Cell Proliferation Experiments in Culture**

Fetal and adult keratinocytes were plated at 5,000 cells per cm<sup>2</sup> and successively subcultured at the same density when 80% confluence. Cell sizes were measured using Scepter Automated Cell Counter (Merck Millipore, Billerica, MA, USA) which uses the Coulter principle of impedance-based particle detection. After trypsinization cells were counted and cumulative cell doublings of the populations were plotted against time in culture. Population doublings were determined by counting cells at the start and end of each passage.

A real-time dynamic monitoring cell analyzer (xCELLigence, Roche Applied Science, Indianapolis, USA) was used to evaluate proliferation of fetal and adult keratinocytes. Wells of 2,500 cells were established in replicates of five. After seeding 150 µl of cell suspension into the wells of the E-plate 96 (Roche Applied Science), cells were allowed to settle for 6 hr before starting analysis. Keratinocyte growth was monitored every hour for a period of one week. Doubling times were derived from the exponential phase of the each growth curves and calculated using RTCA software 1.2.1 (Roche Applied Science).

## **Colony Forming Assay**

To assess colony-forming ability in these feeder-free culture conditions, 200 cells or 500 cells were seeded in triplicate onto 6 cm dishes and cultured for two weeks at 37°C with 5% CO<sub>2</sub>. Cells were fixed with 10% neutral buffered formalin and stained with Rhodamine B (J.T. Baker, Pennsylvania, USA). Colony forming efficiency (CFE) was expressed as the percentage of colonies (>1mm<sup>2</sup>) formed divided by the number of cells seeded.

## **Telomere Restriction Fragment Analysis**

TeloTAGGG Telomere Length Assay kit (Roche Applied Science, Indianapolis, USA) was used for telomere length experiments. 2 µg of genomic DNA was isolated from keratinocytes using DNeasy® Blood & Tissue Kit (Qiagen, Germany), digested with frequent-cutter enzymes Hinf I and RsaI, then separated on a 0.9% agarose gel overnight by gel electrophoresis. Gels were immersed sequentially in depurination, denaturation and neutralization solutions, followed by overnight Southern transfer of DNA fragments to a nylon membrane by capillary action. After DNA fixation by UV-crosslinking at 120 mJ, blotted DNA fragments were hybridized with telomere-specific digoxigenin (DIG)-labeled hybridization probe (TTAGGG) at 42°C overnight. Membranes were washed, blocked, and incubated with anti-DIG antibody covalently coupled to alkaline phosphatase at room temperature for 30 min. Finally, membranes were washed and incubated with CDP-Star, a highly sensitive chemiluminescent substrate. Average telomere restriction fragment (TRF) length was determined by comparing the location of TRF on the blot relative to a molecular weight standard.

## **Flow Cytometry Analysis**

Cultured keratinocytes were trypsinized and cell suspension was fixed in 70% ethanol. Cells were immunolabeled for MHC molecules or isotype control IgG (Table S3) and sorted using BD LSR II Flow Cytometer (Becton Dickinson, Franklin Lakes, NJ). Cells were counted (10,000 events) and data were analyzed with gating using FlowJo research software.
